# Supplementary material for: Loss of Let-7 MicroRNA Upregulates IL-6 in Bone Marrow-Derived Mesenchymal Stem Cells Triggering a Reactive Stromal Response to Prostate Cancer
Source: PubMed Central journal article supplement (PMC3747243; doi:10.1371/journal.pone.0071637), 2013-08-19
Supplement: pone.0071637.s001.pdf [file pone.0071637.s001.pdf]

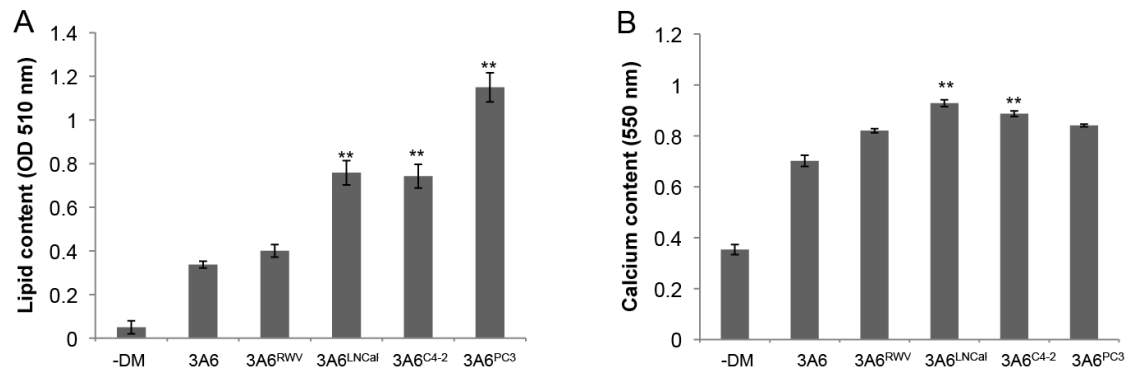

Supplementary Figure S1. Quantification of adipogenesis and osteogenesis of 3A6 derivatives. (A) Oil red O staining to determine lipid droplet content after 21 days of differentiation and (B) Alizarin red S to detect calcium content 14 days after culture in osteogenic-induction media. The stained cells were quantified using a dye extraction method and data are represented as the means  $\pm$  SD.  $**P < 0.001$  between normal 3A6<sup>RWV</sup> and cancer-associated 3A6 derivatives.
