# Supplementary material for: Loss of Let-7 MicroRNA Upregulates IL-6 in Bone Marrow-Derived Mesenchymal Stem Cells Triggering a Reactive Stromal Response to Prostate Cancer
Source: PubMed Central journal article supplement (PMC3747243; doi:10.1371/journal.pone.0071637), 2013-08-19
Supplement: pone.0071637.s004.pdf [file pone.0071637.s004.pdf]

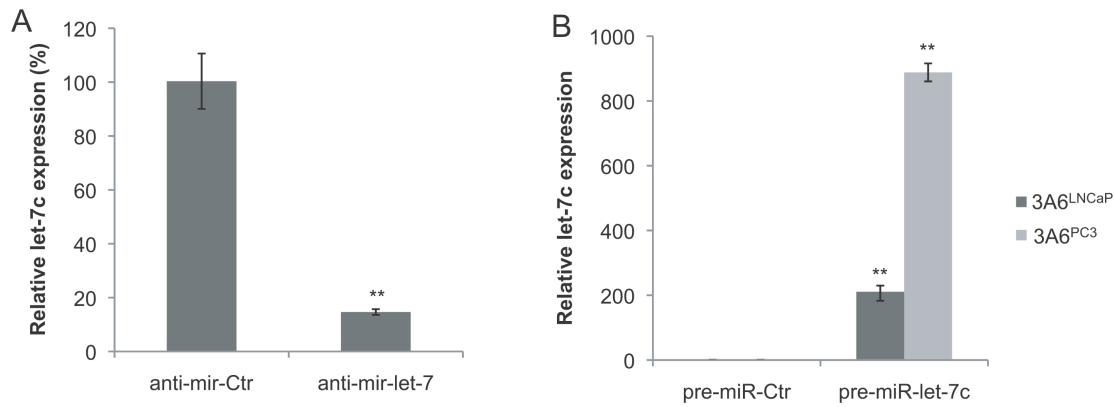

Supplementary Figure S4. Expression level of let-7 in the transfectants of 3A6 derivatives. The 3A6<sup>RWV</sup> normal MSCs (A) and the 3A6<sup>LNCaP</sup> and 3A6<sup>PC3</sup> cancer-associated MSCs (B) were transfected with the indicated anti-miR and miRNA precursor for 72 hr, respectively, and then subjected to quantitative RT-PCR analysis for the expression of let-7c. Values are presented as the means  $\pm$  SD of relative expression levels of let-7c expression in the let-7-specific transfectants compared to that of negative control (Ctr) oligonucleotide transfectants after normalized with the U6 internal control. \*\* $P < 0.005$ .
