# Supplementary material for: Loss of Let-7 MicroRNA Upregulates IL-6 in Bone Marrow-Derived Mesenchymal Stem Cells Triggering a Reactive Stromal Response to Prostate Cancer
Source: PubMed Central journal article supplement (PMC3747243; doi:10.1371/journal.pone.0071637), 2013-08-19
Supplement: pone.0071637.s005.pdf [file pone.0071637.s005.pdf]

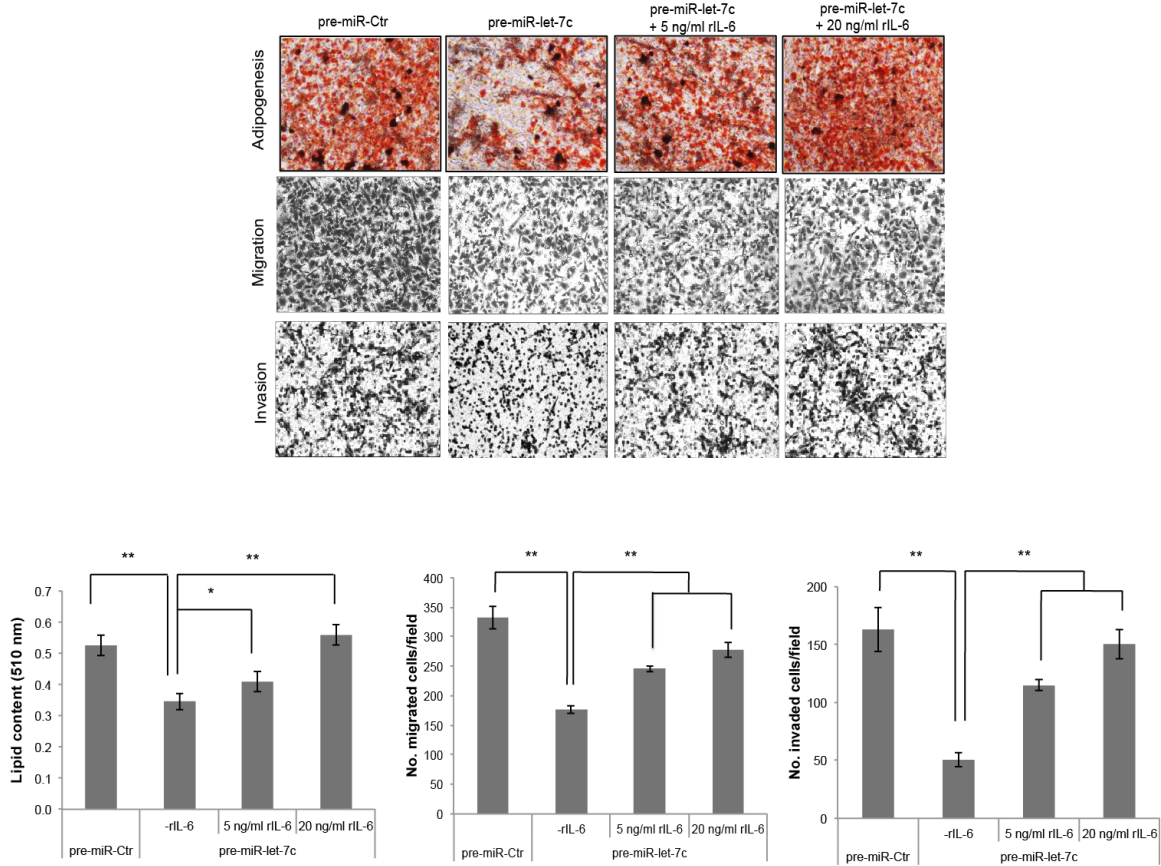

Supplementary Figure S5. Reverse effects of IL-6 on exogenous let-7c-suppressed reactive phenotypes of MSCs. Cancer-associated 3A6<sup>PC3</sup> cells transfected with let-7c precursor were induced to adipogenic differentiation or were cocultured with PC3 prostate cancer cells for transwell migration and invasion assay with the indicated concentration of recombinant IL-6. A microRNA transfection control (pre-mir-Ctr) was used to determine the basal activity of 3A6<sup>PC3</sup>. Representative images of Oil red O staining for adipogenesis and crystal violet staining for transwell migration and invasion from each condition are shown at top. The quantitative data represented as the means  $\pm$  SD for triplicate incubations are shown at the bottom. \* $P < 0.05$ ; \*\* $P < 0.001$ .
