# Supplementary material for: Loss of Let-7 MicroRNA Upregulates IL-6 in Bone Marrow-Derived Mesenchymal Stem Cells Triggering a Reactive Stromal Response to Prostate Cancer
Source: PubMed Central journal article supplement (PMC3747243; doi:10.1371/journal.pone.0071637), 2013-08-19
Supplement: pone.0071637.s006.pdf [file pone.0071637.s006.pdf]

Supplementary Table S1: List of primers and probes used in quantitative PCR

| Gene          | Primer sequences*                                      | UPL <sup>†</sup> | miRNA  | Primer sequences*                                    | UPL <sup>†</sup> |
|---------------|--------------------------------------------------------|------------------|--------|------------------------------------------------------|------------------|
| IL-6          | F: gatgagtacaaaagtctgatcca<br>R: ctgcagccactggttctgt   | #40              | let-7c | RT: [stem-loop]-aaccaat<br>F: cggggtgaggtagtaggttgt  | #21              |
| AdipoQ        | F: ggtgagaaaggagatccaggt<br>R: tgctgagcgggtatacataggc  | #41              | let-7d | RT: [stem-loop]-aactat<br>F: cctaggaagaggtagtaggttgc | #21              |
| Ppar $\gamma$ | F: gacaggaagacaacagacaaat<br>R: ggggtgatgtgttgaacttg   | #7               | let-7f | RT: [stem-loop]-aactat<br>F: tgtgggatgaggtagtagattgt | #21              |
| UCP1          | F: ctggacacggccaaagtc<br>R: ggacacctttatacctaataaactgg | #47              | let-7g | RT: [stem-loop]-aactgt<br>F: aggctgaggtagtagttgt     | #21              |
| OC            | F: tgagagcctcacactcctc<br>R: acctttgctggactctgcac      | #81              | Mir-98 | RT: [stem-loop]-aacaat<br>F: ccagggtgaggtagtaagtgt   | #21              |
| ALP           | F: agaaccceaaaggttcttc<br>R: ctggcttttctctcatggt       | #31              | U6     | RT: [stem-loop]-aaatat<br>F: ttctccgcaaggatgacacgc   | #21              |
| HSPCB         | F: agcctacgttgactattacg<br>R: gaaaggcaaagtctccacct     | #55              |        | U: gtcagggtccgaggt                                   |                  |

<sup>†</sup> Universal Probe Library (Roche Applied Science)

\* F, Forward; R, Reverse; RT, Reverse Transcription; U, Universal Reverse  
[stem-loop]: gttgctctggtgcagggtccgaggtattcgaccagagccaac
