# Supplementary material for: Loss of Let-7 MicroRNA Upregulates IL-6 in Bone Marrow-Derived Mesenchymal Stem Cells Triggering a Reactive Stromal Response to Prostate Cancer
Source: PubMed Central journal article supplement (PMC3747243; doi:10.1371/journal.pone.0071637), 2013-08-19
Supplement: pone.0071637.s007.pdf [file pone.0071637.s007.pdf]

Supplementary Table S2. Immunophenotype of MSC cell lines derived from 3-D RWV co-culture system at different passages

| <i>Cell lines</i>    | <i>Passages</i> | <i>Surface markers</i><br>(relative fluorescent intensity) |             |             |
|----------------------|-----------------|------------------------------------------------------------|-------------|-------------|
|                      |                 | CD166                                                      | CD29        | CD44        |
| 3A6 <sup>RWV</sup>   | P1              | 12.32 ±0.78                                                | 26.93 ±0.90 | 50.82 ±4.94 |
|                      | P6              | 12.97 ±0.53                                                | 21.63 ±3.36 | 46.85 ±2.83 |
|                      | P15             | 11.37 ±1.07                                                | 18.96 ±3.05 | 51.48 ±6.38 |
| 3A6 <sup>LNCaP</sup> | P1              | 13.65 ±1.42                                                | 20.75 ±0.94 | 41.16±5.90  |
|                      | P6              | 13.88 ±1.50                                                | 22.28 ±1.95 | 49.15 ±7.27 |
|                      | P15             | 12.75 ±0.85                                                | 20.14 ±1.37 | 46.19 ±8.00 |
| 3A6 <sup>C4-2</sup>  | P1              | 14.76 ±2.50                                                | 28.57±2.98  | 57.56 ±7.48 |
|                      | P6              | 14.41 ±2.07                                                | 28.24±1.68  | 63.33 ±0.28 |
|                      | P15             | 14.09±3.80                                                 | 31.18 ±5.23 | 81.27 ±9.16 |
| 3A6 <sup>PC3</sup>   | P1              | 13.28 ±1.10                                                | 23.69 ±1.25 | 46.66 ±5.19 |
|                      | P6              | 9.68 ±1.64                                                 | 19.43 ±4.00 | 42.07 ±0.97 |
|                      | P15             | 17.64 ±1.66                                                | 20.56 ±4.84 | 61.83±3.84  |

Data are expressed as mean±standard deviation.
